# Supplementary material
Source: MDPI journal article supplement (https://www.mdpi.com/2073-4352/11/9/1035)
Supplement: s1 [file s1]

## Supporting Information

### Stepwise Evolution of Photocatalytic Spinel-Structured (Co,Cr,Fe,Mn,Ni)<sub>3</sub>O<sub>4</sub> High Entropy Oxides from First-Principles Calculations to Machine Learning

Chia-Chun Lin<sup>1,2</sup>, Chia-Wei Chang<sup>1</sup>, Chao-Cheng Kaun<sup>2\*</sup>, Yen-Hsun Su<sup>1\*</sup>

<sup>1</sup>Department of Materials Science and Engineering, National Cheng Kung University,

Tainan 70101, Taiwan

<sup>2</sup>Research Center for Applied Sciences, Academia Sinica, Taipei 11529, Taiwan

\*Corresponding author's e-mail: [yhsu@mail.ncku.edu.tw](mailto:yhsu@mail.ncku.edu.tw), [kauncc@gate.sinica.edu.tw](mailto:kauncc@gate.sinica.edu.tw)

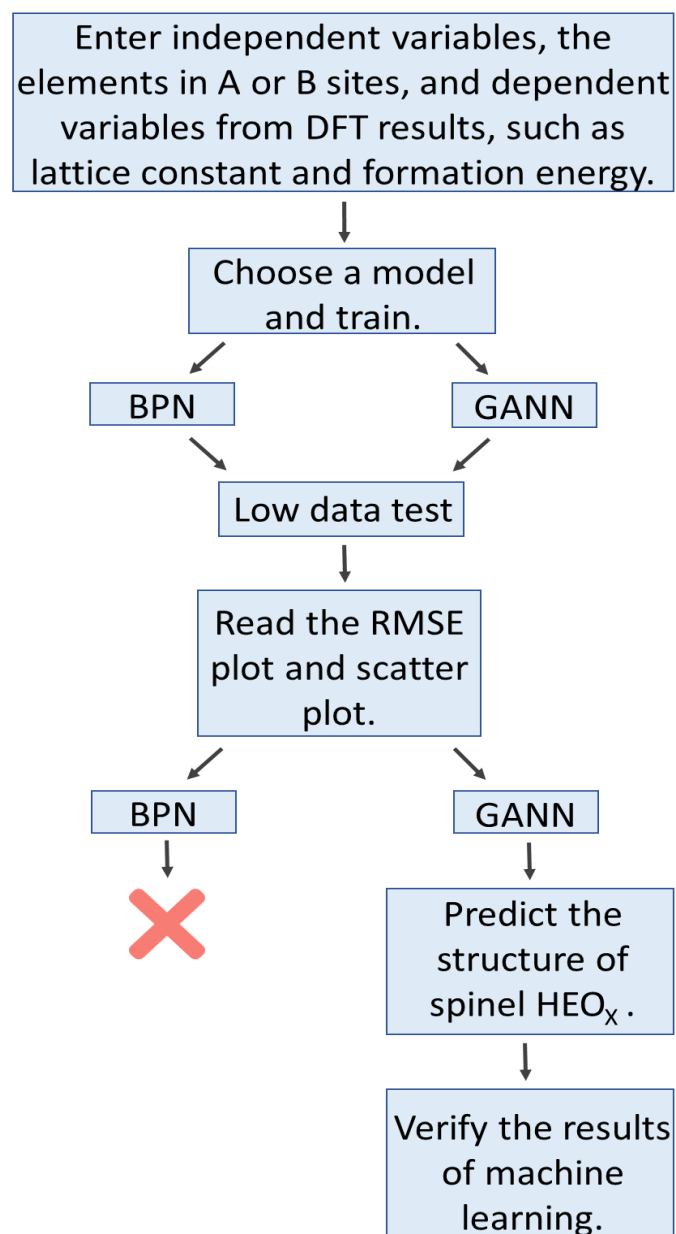

**Supplementary Figure S1** Workflow of the HEO<sub>x</sub> investigation.

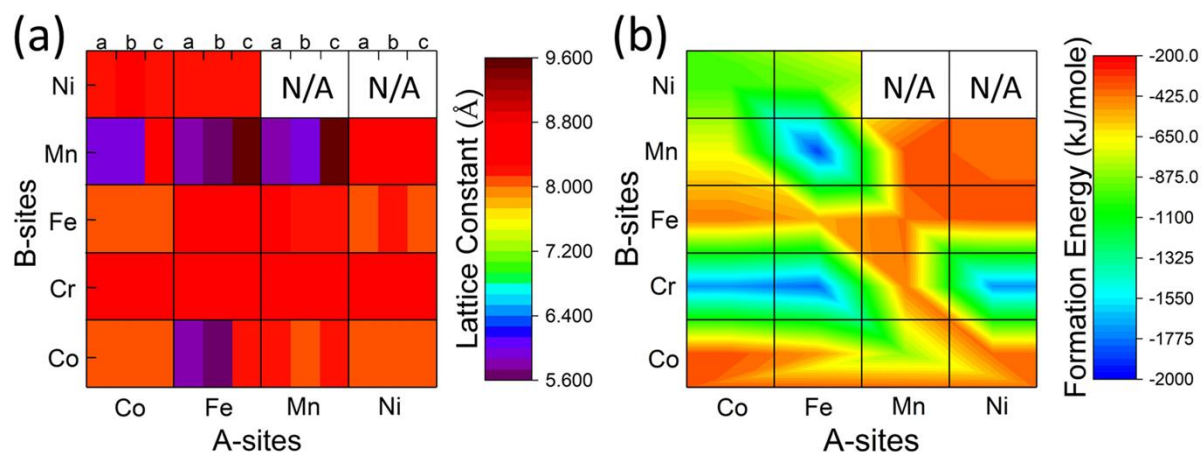

**Supplementary Figure S2** Input data of the low data test: (a) lattice constants and (b) formation energies. The metal elements on A and B sites are represented in X-axis and Y-axis, respectively. The a, b, and c in Fig. (a) show the lattice constants of the structures. The color is related to the length and magnitude.

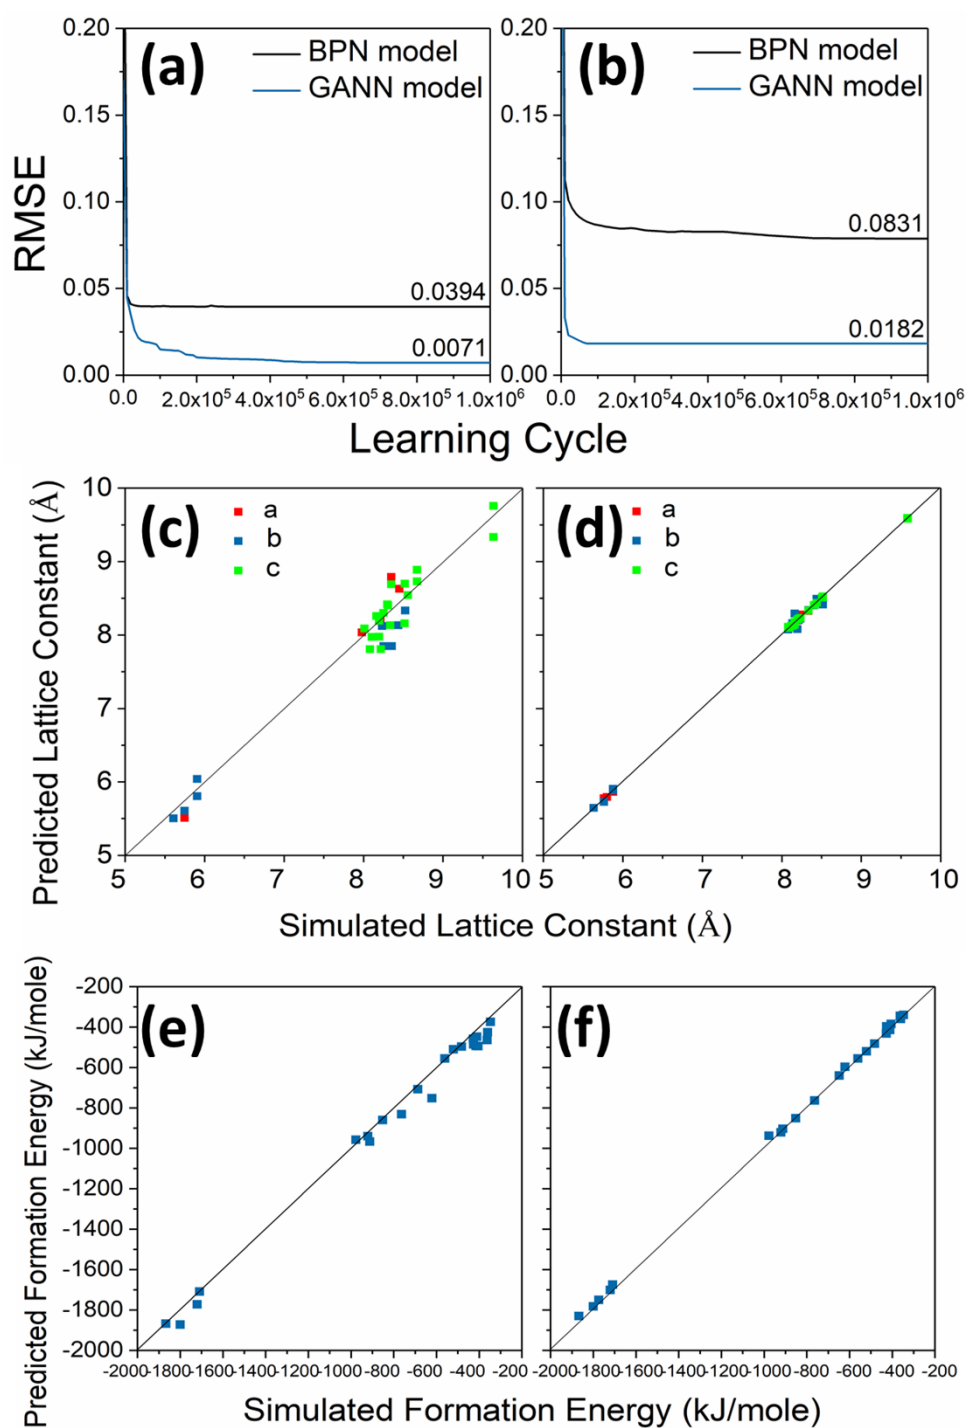

**Supplementary Figure S3** Root Mean-Squared Errors of (a) the lattice constants and (b) formation energies. The DFT calculated versus ML predicted lattice constants from the (c) BPN and (d) GANN models, and formation energies from the (e) BPN and (f) GANN models.

**Supplementary Table S1** Comparison of the computational results for the AB<sub>2</sub>O<sub>4</sub> structures using DFT and ML

| Computing method | Composition (Structure)                                                                                                                        | # of atoms in cell | Computing time (sec) | Results-lattice constant (Å)<br>a/b/c | Results-formation energy (eV/Cell) |
|------------------|------------------------------------------------------------------------------------------------------------------------------------------------|--------------------|----------------------|---------------------------------------|------------------------------------|
| DFT              | Co <sub>3</sub> O <sub>4</sub> (Cubic)                                                                                                         | 56                 | 1052.093             | 8.096/8.096/8.096                     | -1355.020                          |
| DFT              | CoCr <sub>2</sub> O <sub>4</sub> (Cubic)                                                                                                       | 56                 | 751.268              | 8.408/8.408/8.408                     | -1751.270                          |
| DFT              | CoFe <sub>2</sub> O <sub>4</sub> (Cubic)                                                                                                       | 56                 | 1163.274             | 8.121/8.121/8.121                     | -456.854                           |
| DFT              | CoMn <sub>2</sub> O <sub>4</sub> (Tetragonal)                                                                                                  | 28                 | 851.38               | 5.876/ 5.876/8.515                    | -561.145                           |
| DFT              | CoNi <sub>2</sub> O <sub>4</sub> (Cubic)                                                                                                       | 56                 | 994.785              | 8.163/8.163/8.163                     | -378.270                           |
| DFT              | FeCo <sub>2</sub> O <sub>4</sub> (Orthorhombic)                                                                                                | 28                 | 3097.944             | 5.799/ 5.632/8.160                    | -471.693                           |
| DFT              | FeCr <sub>2</sub> O <sub>4</sub> (Cubic)                                                                                                       | 56                 | 695.639              | 8.439/8.439/8.439                     | -1799.830                          |
| DFT              | Fe <sub>3</sub> O <sub>4</sub> (Cubic)                                                                                                         | 56                 | 1075.448             | 8.517/8.517/8.517                     | -520.681                           |
| DFT              | FeMn <sub>2</sub> O <sub>4</sub> (Tetragonal)                                                                                                  | 28                 | 706.203              | 5.760/5.760/9.578                     | -632.056                           |
| DFT              | FeNi <sub>2</sub> O <sub>4</sub> (Cubic)                                                                                                       | 56                 | 1150.191             | 8.212/8.212/8.212                     | -362.646                           |
| DFT              | MnCo <sub>2</sub> O <sub>4</sub> (Cubic)                                                                                                       | 56                 | 792.678              | 8.195/8.195/8.195                     | -348.549                           |
| DFT              | MnCr <sub>2</sub> O <sub>4</sub> (Cubic)                                                                                                       | 56                 | 935.966              | 8.507/8.507/8.507                     | -1867.26                           |
| DFT              | MnFe <sub>2</sub> O <sub>4</sub> (Cubic)                                                                                                       | 56                 | 1031.612             | 8.234/8.234/8.234                     | -414.651                           |
| DFT              | Mn <sub>3</sub> O <sub>4</sub> (Tetragonal)                                                                                                    | 28                 | 1331.249             | 5.875/5.875/9.580                     | -687.745                           |
| DFT              | NiCo <sub>2</sub> O <sub>4</sub> (Cubic)                                                                                                       | 56                 | 1128.422             | 8.080/8.080/8.080                     | -405.259                           |
| DFT              | NiCr <sub>2</sub> O <sub>4</sub> (Cubic)                                                                                                       | 56                 | 1282.038             | 8.336/8.336/8.336                     | -1708.99                           |
| DFT              | NiFe <sub>2</sub> O <sub>4</sub> (Cubic)                                                                                                       | 56                 | 1165.679             | 8.136/8.136/8.136                     | -482.344                           |
| DFT              | NiMn <sub>2</sub> O <sub>4</sub> (Cubic)                                                                                                       | 56                 | 755.241              | 8.335/8.335/8.335                     | -621.506                           |
| ML               | Label I:<br>(Mn <sub>3</sub> ,Ni <sub>5</sub> )(Co <sub>7</sub> ,Cr <sub>3</sub> ,Fe <sub>2</sub> ,Mn <sub>4</sub> )O <sub>32</sub><br>(Cubic) |                    | > 0.1                | 8.161/8.184/8.136                     | -849.810                           |
| DFT              | Label I:<br>(Mn <sub>3</sub> ,Ni <sub>5</sub> )(Co <sub>7</sub> ,Cr <sub>3</sub> ,Fe <sub>2</sub> ,Mn <sub>4</sub> )O <sub>32</sub><br>(Cubic) | 56                 | 24695.295            | 8.342/8.313/8.317                     | -851.370                           |
| ML               | Label II:<br>Co <sub>8</sub> (Cr <sub>4</sub> Fe <sub>4</sub> Mn <sub>4</sub> Ni <sub>4</sub> )O <sub>32</sub><br>(Cubic)                      |                    | > 0.1                | 8.304/8.324/8.249                     | -763.000                           |
| DFT              | Label II:<br>Co <sub>8</sub> (Cr <sub>4</sub> Fe <sub>4</sub> Mn <sub>4</sub> Ni <sub>4</sub> )O <sub>32</sub><br>(Cubic)                      | 56                 | 24572.371            | 8.309/8.325/8.249                     | -762.930                           |
| ML               | Label III:<br>Fe <sub>8</sub> (Co <sub>4</sub> Cr <sub>4</sub> Mn <sub>4</sub> Ni <sub>4</sub> )O <sub>32</sub><br>(Cubic)                     |                    | > 0.1                | 8.331/8.323/8.336                     | -921.860                           |
| DFT              | Label III:                                                                                                                                     | 56                 | 58048.316            | 8.363/8.242/8.301                     | -921.700                           |

|     |                                                                                                                               |     |            |                   |          |
|-----|-------------------------------------------------------------------------------------------------------------------------------|-----|------------|-------------------|----------|
|     | $\text{Fe}_8(\text{Co}_4\text{Cr}_4\text{Mn}_4\text{Ni}_4)\text{O}_{32}$<br>(Cubic)                                           |     |            |                   |          |
| ML  | Label IV:<br>$\text{Mn}_8(\text{Co}_4\text{Cr}_4\text{Fe}_4\text{Ni}_4)\text{O}_{32}$<br>(Cubic)                              |     | > 0.1      | 8.324/8.332/8.314 | -978.910 |
| DFT | Label IV:<br>$\text{Mn}_8(\text{Co}_4\text{Cr}_4\text{Fe}_4\text{Ni}_4)\text{O}_{32}$<br>(Cubic)                              | 56  | 21384.867  | 8.319/8.315/8.318 | -977.020 |
| ML  | $\text{Co}_{1.0}(\text{Co}_{0.25}\text{Cr}_{0.25}\text{Fe}_{0.25}\text{Mn}_{0.25}\text{Ni}_1)\text{O}_4$<br>(Cubic Supercell) |     | > 0.1      | 8.188/8.166/8.169 | -396.112 |
| DFT | $\text{Co}_{16}(\text{Co}_4\text{Cr}_4\text{Fe}_4\text{Mn}_4\text{Ni}_{16})\text{O}_{64}$<br>(Cubic Supercell)                | 112 | 110483.312 | 8.359/8.330/8.327 | -400.279 |
| ML  | $\text{Ni}_{1.0}(\text{Co}_{0.25}\text{Cr}_{0.25}\text{Fe}_1\text{Mn}_{0.25}\text{Ni}_{0.25})\text{O}_4$ (Cubic Supercell)    |     | > 0.1      | 8.194/8.169/8.164 | -522.275 |
| DFT | $\text{Ni}_{32}(\text{Co}_8\text{Cr}_8\text{Fe}_{32}\text{Mn}_8\text{Ni}_8)\text{O}_{128}$<br>(Cubic Supercell)               | 224 | 253066.344 | 8.211/8.323/8.335 | -527.184 |

**Supplementary Table S2** Reported Major Spinel ( $\text{AB}_2\text{O}_4$ )<sup>42</sup>

| A sites \ B sites | Co                        | Cr                        | Fe                        | Mn                        | Ni                        |
|-------------------|---------------------------|---------------------------|---------------------------|---------------------------|---------------------------|
|                   | Co                        | Cr                        | Fe                        | Mn                        | Ni                        |
| Co                | $\text{Co}_3\text{O}_4$   | $\text{CoCr}_2\text{O}_4$ | $\text{CoFe}_2\text{O}_4$ | $\text{CoMn}_2\text{O}_4$ | $\text{CoNi}_2\text{O}_4$ |
| Cr                | -                         | -                         | -                         | -                         | -                         |
| Fe                | $\text{FeCo}_2\text{O}_4$ | $\text{FeCr}_2\text{O}_4$ | $\text{Fe}_3\text{O}_4$   | $\text{FeMn}_2\text{O}_4$ | $\text{FeNi}_2\text{O}_4$ |
| Mn                | $\text{MnCo}_2\text{O}_4$ | $\text{MnCr}_2\text{O}_4$ | $\text{MnFe}_2\text{O}_4$ | $\text{Mn}_3\text{O}_4$   | -                         |
| Ni                | $\text{NiCo}_2\text{O}_4$ | $\text{NiCr}_2\text{O}_4$ | $\text{NiFe}_2\text{O}_4$ | $\text{NiMn}_2\text{O}_4$ | -                         |

**Supplementary Table S3** The HEOx compositions of each condition.

| Symbol         | Position | Composition                                        |
|----------------|----------|----------------------------------------------------|
| A <sub>1</sub> | A sites  | $\text{Co}_x(\text{Fe},\text{Mn},\text{Ni})_{1-x}$ |
| A <sub>2</sub> | A sites  | $\text{Fe}_x(\text{Co},\text{Mn},\text{Ni})_{1-x}$ |

|                      |         |                                         |
|----------------------|---------|-----------------------------------------|
| <b>A<sub>3</sub></b> | A sites | $\text{Mn}_x(\text{Co,Fe,Ni})_{1-x}$    |
| <b>A<sub>4</sub></b> | A sites | $\text{Ni}_x(\text{Co,Fe,Mn})_{1-x}$    |
| <b>B<sub>1</sub></b> | B sites | $\text{Co}_y(\text{Cr,Fe,Mn,Ni})_{1-y}$ |
| <b>B<sub>2</sub></b> | B sites | $\text{Cr}_y(\text{Co,Fe,Mn,Ni})_{1-y}$ |
| <b>B<sub>3</sub></b> | B sites | $\text{Fe}_y(\text{Co,Cr,Mn,Ni})_{1-y}$ |
| <b>B<sub>4</sub></b> | B sites | $\text{Mn}_y(\text{Co,Cr,Fe,Ni})_{1-y}$ |
| <b>B<sub>5</sub></b> | B sites | $\text{Ni}_y(\text{Co,Cr,Fe,Mn})_{1-y}$ |

**Supplementary Table S4** HEO<sub>x</sub> model for prediction and calculation.

| <b>Label</b> | <b>Co<sub>A</sub></b> | <b>Cr<sub>A</sub></b> | <b>Fe<sub>A</sub></b> | <b>Mn<sub>A</sub></b> | <b>Ni<sub>A</sub></b> | <b>Co<sub>B</sub></b> | <b>Cr<sub>B</sub></b> | <b>Fe<sub>B</sub></b> | <b>Mn<sub>B</sub></b> | <b>Ni<sub>B</sub></b> |
|--------------|-----------------------|-----------------------|-----------------------|-----------------------|-----------------------|-----------------------|-----------------------|-----------------------|-----------------------|-----------------------|
| <b>I.</b>    | 0                     | 0                     | 0                     | 3                     | 5                     | 7                     | 3                     | 2                     | 4                     | 0                     |
| <b>II.</b>   | 8                     | 0                     | 0                     | 0                     | 0                     | 0                     | 4                     | 4                     | 4                     | 4                     |
| <b>III.</b>  | 0                     | 0                     | 8                     | 0                     | 0                     | 4                     | 4                     | 0                     | 4                     | 4                     |
| <b>IV.</b>   | 0                     | 0                     | 0                     | 8                     | 0                     | 4                     | 4                     | 4                     | 0                     | 4                     |

## Supplementary information Structure card for VASP.

```
#=====
# CRYSTAL DATA
#-----
data_VESTA_phase_1

  _chemical_name_common          'Co3O4'
  _cell_length_a                 8.150493
  _cell_length_b                 8.150493
  _cell_length_c                 8.150493
  _cell_angle_alpha              90.000000
  _cell_angle_beta               90.000000
  _cell_angle_gamma              90.000000
  _cell_volume                   541.441554 'F d
  _space_group_name_H-M_alt      -3 m' 227
  _space_group_IT_number

loop_
  _space_group_symop_operation_xyz
  'x, y, z'
  '-x, -y+1/2, z+1/2'
  '-x+1/2, y+1/2, -z'
  'x+1/2, -y, -z+1/2'
  'z, x, y'
  'z+1/2, -x, -y+1/2'
  '-z, -x+1/2, y+1/2'
  '-z+1/2, x+1/2, -y'
  'y, z, x'
  '-y+1/2, z+1/2, -x'
  'y+1/2, -z, -x+1/2'
  '-y, -z+1/2, x+1/2' 'y+3/4, x+1/4, -
z+3/4'
  '-y+1/4, -x+1/4, -z+1/4' 'y+1/4, -
x+3/4, z+3/4'
  '-y+3/4, x+3/4, z+1/4' 'x+3/4,
z+1/4, -y+3/4' '-x+3/4, z+3/4,
y+1/4'
  '-x+1/4, -z+1/4, -y+1/4' 'x+1/4, -
z+3/4, y+3/4' 'z+3/4, y+1/4, -
x+3/4' 'z+1/4, -y+3/4, x+3/4'
  '-z+3/4, y+3/4, x+1/4'
  '-z+1/4, -y+1/4, -x+1/4'
  '-x+1/4, -y+1/4, -z+1/4' 'x+1/4,
y+3/4, -z+3/4' 'x+3/4, -y+3/4,
z+1/4'
  '-x+3/4, y+1/4, z+3/4'
  '-z+1/4, -x+1/4, -y+1/4' '-z+3/4,
x+1/4, y+3/4' 'z+1/4, x+3/4, -
y+3/4' 'z+3/4, -x+3/4, y+1/4'
  '-y+1/4, -z+1/4, -x+1/4' 'y+3/4, -
z+3/4, x+1/4'
  '-y+3/4, z+1/4, x+3/4' 'y+1/4,
z+3/4, -x+3/4' '-y+1/2, -x, z+1/2'
  'y, x, z'
  '-y, x+1/2, -z+1/2'
```



'y+1/2, -x+1/2, -z'  
 '-x+1/2, -z, y+1/2'  
 'x+1/2, -z+1/2, -y'  
 'x, z, y'  
 '-x, z+1/2, -y+1/2'  
 '-z+1/2, -y, x+1/2'  
 '-z, y+1/2, -x+1/2'  
 'z+1/2, -y+1/2, -x'  
 'z, y, x'  
 'x, y+1/2, z+1/2' '-x, -  
 y, z'  
 '-x+1/2, y, -z+1/2'  
 'x+1/2, -y+1/2, -z'  
 'z, x+1/2, y+1/2' 'z+1/2, -  
 x+1/2, -y'  
 '-z, -x, y'  
 '-z+1/2, x, -y+1/2'  
 'y, z+1/2, x+1/2'  
 '-y+1/2, z, -x+1/2'  
 'y+1/2, -z+1/2, -x'  
 '-y, -z, x'  
 'y+3/4, x+3/4, -z+1/4'  
 '-y+1/4, -x+3/4, -z+3/4'  
 'y+1/4, -x+1/4, z+1/4'  
 '-y+3/4, x+1/4, z+3/4'  
 'x+3/4, z+3/4, -y+1/4' '-  
 x+3/4, z+1/4, y+3/4'  
 '-x+1/4, -z+3/4, -y+3/4' 'x+1/4,  
 -z+1/4, y+1/4' 'z+3/4, y+3/4, -  
 x+1/4' 'z+1/4, -y+1/4, x+1/4'  
 '-z+3/4, y+1/4, x+3/4'  
 '-z+1/4, -y+3/4, -x+3/4'  
 '-x+1/4, -y+3/4, -z+3/4' 'x+1/4,  
 y+1/4, -z+1/4' 'x+3/4, -y+1/4,  
 z+3/4'  
 '-x+3/4, y+3/4, z+1/4'  
 '-z+1/4, -x+3/4, -y+3/4' '-  
 z+3/4, x+3/4, y+1/4' 'z+1/4,  
 x+1/4, -y+1/4' 'z+3/4, -x+1/4,  
 y+3/4'  
 '-y+1/4, -z+3/4, -x+3/4'  
 'y+3/4, -z+1/4, x+3/4'  
 '-y+3/4, z+3/4, x+1/4'  
 'y+1/4, z+1/4, -x+1/4' '-  
 y+1/2, -x+1/2, z'  
 'y, x+1/2, z+1/2' '-y,  
 x, -z'  
 'y+1/2, -x, -z+1/2'  
 '-x+1/2, -z+1/2, y'  
 'x+1/2, -z, -y+1/2'  
 'x, z+1/2, y+1/2' '-x,  
 z, -y'  
 '-z+1/2, -y+1/2, x'  
 '-z, y, -x'  
 'z+1/2, -y, -x+1/2'  
 'z, y+1/2, x+1/2'  
 'x+1/2, y, z+1/2'

'-x+1/2, -y+1/2, z'  
 '-x, y+1/2, -z+1/2'  
 'x, -y, -z' 'z+1/2, x,  
 y+1/2' 'z, -x, -y'  
 '-z+1/2, -x+1/2, y'  
 '-z, x+1/2, -y+1/2'  
 'y+1/2, z, x+1/2'  
 '-y, z+1/2, -x+1/2'  
 'y, -z, -x'  
 '-y+1/2, -z+1/2, x' 'y+1/4,  
 x+1/4, -z+1/4'  
 '-y+3/4, -x+1/4, -z+3/4'  
 'y+3/4, -x+3/4, z+1/4'  
 '-y+1/4, x+3/4, z+3/4'  
 'x+1/4, z+1/4, -y+1/4' '-  
 x+1/4, z+3/4, y+3/4'  
 '-x+3/4, -z+1/4, -y+3/4' 'x+3/4,  
 -z+3/4, y+1/4' 'z+1/4, y+1/4, -  
 x+1/4' 'z+3/4, -y+3/4, x+1/4'  
 '-z+1/4, y+3/4, x+3/4'  
 '-z+3/4, -y+1/4, -x+3/4'  
 '-x+3/4, -y+1/4, -z+3/4' 'x+3/4,  
 y+3/4, -z+1/4' 'x+1/4, -y+3/4,  
 z+3/4'  
 '-x+1/4, y+1/4, z+1/4'  
 '-z+3/4, -x+1/4, -y+3/4' '-  
 z+1/4, x+1/4, y+1/4' 'z+3/4,  
 x+3/4, -y+1/4' 'z+1/4, -x+3/4,  
 y+3/4'  
 '-y+3/4, -z+1/4, -x+3/4'  
 'y+1/4, -z+3/4, x+3/4'  
 '-y+1/4, z+1/4, x+1/4'  
 'y+3/4, z+3/4, -x+1/4' '-y, -x,  
 z'  
 'y+1/2, x, z+1/2'  
 '-y+1/2, x+1/2, -z'  
 'y, -x+1/2, -z+1/2'  
 '-x, -z, y'  
 'x, -z+1/2, -y+1/2'  
 'x+1/2, z, y+1/2'  
 '-x+1/2, z+1/2, -y'  
 '-z, -y, x'  
 '-z+1/2, y+1/2, -x'  
 'z, -y+1/2, -x+1/2'  
 'z+1/2, y, x+1/2'  
 'x+1/2, y+1/2, z'  
 '-x+1/2, -y, z+1/2'  
 '-x, y, -z'  
 'x, -y+1/2, -z+1/2'  
 'z+1/2, x+1/2, y' 'z, -  
 x+1/2, -y+1/2'  
 '-z+1/2, -x, y+1/2'  
 '-z, x, -y' 'y+1/2,  
 z+1/2, x' '-y, z, -x'  
 'y, -z+1/2, -x+1/2'

'-y+1/2, -z, x+1/2' 'y+1/4, x+3/4, -  
 z+3/4'  
 '-y+3/4, -x+3/4, -z+1/4' 'y+3/4, -  
 x+1/4, z+3/4'  
 '-y+1/4, x+1/4, z+1/4' 'x+1/4,  
 z+3/4, -y+3/4' '-x+1/4, z+1/4,  
 y+1/4'  
 '-x+3/4, -z+3/4, -y+1/4' 'x+3/4, -  
 z+1/4, y+3/4' 'z+1/4, y+3/4, -  
 x+3/4' 'z+3/4, -y+1/4, x+3/4'  
 '-z+1/4, y+1/4, x+1/4'  
 '-z+3/4, -y+3/4, -x+1/4'  
 '-x+3/4, -y+3/4, -z+1/4' 'x+3/4,  
 y+1/4, -z+3/4' 'x+1/4, -y+1/4,  
 z+1/4'  
 '-x+1/4, y+3/4, z+3/4'  
 '-z+3/4, -x+3/4, -y+1/4' '-z+1/4,  
 x+3/4, y+3/4' 'z+3/4, x+1/4, -  
 y+3/4' 'z+1/4, -x+1/4, y+1/4'  
 '-y+3/4, -z+3/4, -x+1/4' 'y+1/4, -  
 z+1/4, x+1/4'  
 '-y+1/4, z+3/4, x+3/4' 'y+3/4,  
 z+1/4, -x+3/4' '-y, -x+1/2, z+1/2'  
 'y+1/2, x+1/2, z'  
 '-y+1/2, x, -z+1/2'  
 'y, -x, -z'  
 '-x, -z+1/2, y+1/2'  
 'x, -z, -y' 'x+1/2, z+1/2, y'  
 '-x+1/2, z, -y+1/2'  
 '-z, -y+1/2, x+1/2'  
 '-z+1/2, y, -x+1/2'  
 'z, -y, -x' 'z+1/2, y+1/2, x'

| loop_                     |     |          |          |          |      |          |    |
|---------------------------|-----|----------|----------|----------|------|----------|----|
| _atom_site_label          |     |          |          |          |      |          |    |
| _atom_site_occupancy      |     |          |          |          |      |          |    |
| _atom_site_fract_x        |     |          |          |          |      |          |    |
| _atom_site_fract_y        |     |          |          |          |      |          |    |
| _atom_site_fract_z        |     |          |          |          |      |          |    |
| _atom_site_adp_type       |     |          |          |          |      |          |    |
| _atom_site_B_iso_or_equiv |     |          |          |          |      |          |    |
| _atom_site_type_symbol    |     |          |          |          |      |          |    |
| Co1                       | 1.0 | 0.125000 | 0.125000 | 0.625000 | Biso | 1.000000 | Co |
| Co2                       | 1.0 | 0.375000 | 0.875000 | 0.125000 | Biso | 1.000000 | Co |
| Co3                       | 1.0 | 0.375000 | 0.125000 | 0.875000 | Biso | 1.000000 | Co |
| Co4                       | 1.0 | 0.125000 | 0.875000 | 0.375000 | Biso | 1.000000 | Co |
| Co5                       | 1.0 | 0.125000 | 0.375000 | 0.875000 | Biso | 1.000000 | Co |
| Co6                       | 1.0 | 0.375000 | 0.625000 | 0.375000 | Biso | 1.000000 | Co |
| Co7                       | 1.0 | 0.375000 | 0.375000 | 0.625000 | Biso | 1.000000 | Co |
| Co8                       | 1.0 | 0.125000 | 0.625000 | 0.125000 | Biso | 1.000000 | Co |
| Co9                       | 1.0 | 0.875000 | 0.625000 | 0.875000 | Biso | 1.000000 | Co |
| Co10                      | 1.0 | 0.625000 | 0.625000 | 0.625000 | Biso | 1.000000 | Co |
| Co11                      | 1.0 | 0.875000 | 0.875000 | 0.625000 | Biso | 1.000000 | Co |

|      |     |          |          |          |      |          |    |
|------|-----|----------|----------|----------|------|----------|----|
| Co12 | 1.0 | 0.625000 | 0.875000 | 0.875000 | Biso | 1.000000 | Co |
| Co13 | 1.0 | 0.875000 | 0.125000 | 0.375000 | Biso | 1.000000 | Co |
| Co14 | 1.0 | 0.625000 | 0.375000 | 0.375000 | Biso | 1.000000 | Co |
| Co15 | 1.0 | 0.625000 | 0.125000 | 0.125000 | Biso | 1.000000 | Co |
| Co16 | 1.0 | 0.875000 | 0.375000 | 0.125000 | Biso | 1.000000 | Co |
| Co17 | 1.0 | 0.000000 | 0.000000 | 0.000000 | Biso | 1.000000 | Co |
| Co18 | 1.0 | 0.750000 | 0.750000 | 0.250000 | Biso | 1.000000 | Co |
| Co19 | 1.0 | 0.500000 | 0.000000 | 0.500000 | Biso | 1.000000 | Co |
| Co20 | 1.0 | 0.000000 | 0.500000 | 0.500000 | Biso | 1.000000 | Co |
| Co21 | 1.0 | 0.500000 | 0.500000 | 0.000000 | Biso | 1.000000 | Co |
| Co22 | 1.0 | 0.250000 | 0.250000 | 0.250000 | Biso | 1.000000 | Co |
| Co23 | 1.0 | 0.250000 | 0.750000 | 0.750000 | Biso | 1.000000 | Co |
| Co24 | 1.0 | 0.750000 | 0.250000 | 0.750000 | Biso | 1.000000 | Co |
| O1   | 1.0 | 0.111246 | 0.111246 | 0.388754 | Biso | 1.000000 | O  |
| O2   | 1.0 | 0.138754 | 0.861246 | 0.138754 | Biso | 1.000000 | O  |
| O3   | 1.0 | 0.388754 | 0.111246 | 0.111246 | Biso | 1.000000 | O  |
| O4   | 1.0 | 0.361246 | 0.861246 | 0.361246 | Biso | 1.000000 | O  |
| O5   | 1.0 | 0.111246 | 0.388754 | 0.111246 | Biso | 1.000000 | O  |
| O6   | 1.0 | 0.138754 | 0.638754 | 0.361246 | Biso | 1.000000 | O  |
| O7   | 1.0 | 0.388754 | 0.388754 | 0.388754 | Biso | 1.000000 | O  |
| O8   | 1.0 | 0.361246 | 0.638754 | 0.138754 | Biso | 1.000000 | O  |
| O9   | 1.0 | 0.888754 | 0.388754 | 0.888754 | Biso | 1.000000 | O  |
| O10  | 1.0 | 0.638754 | 0.638754 | 0.861246 | Biso | 1.000000 | O  |
| O11  | 1.0 | 0.888754 | 0.111246 | 0.611246 | Biso | 1.000000 | O  |
| O12  | 1.0 | 0.638754 | 0.861246 | 0.638754 | Biso | 1.000000 | O  |
| O13  | 1.0 | 0.611246 | 0.111246 | 0.888754 | Biso | 1.000000 | O  |
| O14  | 1.0 | 0.861246 | 0.861246 | 0.861246 | Biso | 1.000000 | O  |
| O15  | 1.0 | 0.611246 | 0.388754 | 0.611246 | Biso | 1.000000 | O  |
| O16  | 1.0 | 0.861246 | 0.638754 | 0.638754 | Biso | 1.000000 | O  |
| O17  | 1.0 | 0.611246 | 0.888754 | 0.111246 | Biso | 1.000000 | O  |
| O18  | 1.0 | 0.861246 | 0.361246 | 0.361246 | Biso | 1.000000 | O  |
| O19  | 1.0 | 0.888754 | 0.611246 | 0.111246 | Biso | 1.000000 | O  |
| O20  | 1.0 | 0.638754 | 0.138754 | 0.361246 | Biso | 1.000000 | O  |
| O21  | 1.0 | 0.888754 | 0.888754 | 0.388754 | Biso | 1.000000 | O  |
| O22  | 1.0 | 0.638754 | 0.361246 | 0.138754 | Biso | 1.000000 | O  |
| O23  | 1.0 | 0.611246 | 0.611246 | 0.388754 | Biso | 1.000000 | O  |
| O24  | 1.0 | 0.861246 | 0.138754 | 0.138754 | Biso | 1.000000 | O  |
| O25  | 1.0 | 0.388754 | 0.888754 | 0.888754 | Biso | 1.000000 | O  |
| O26  | 1.0 | 0.138754 | 0.138754 | 0.861246 | Biso | 1.000000 | O  |
| O27  | 1.0 | 0.388754 | 0.611246 | 0.611246 | Biso | 1.000000 | O  |
| O28  | 1.0 | 0.138754 | 0.361246 | 0.638754 | Biso | 1.000000 | O  |
| O29  | 1.0 | 0.111246 | 0.611246 | 0.888754 | Biso | 1.000000 | O  |
| O30  | 1.0 | 0.361246 | 0.361246 | 0.861246 | Biso | 1.000000 | O  |
| O31  | 1.0 | 0.111246 | 0.888754 | 0.611246 | Biso | 1.000000 | O  |
| O32  | 1.0 | 0.361246 | 0.138754 | 0.638754 | Biso | 1.000000 | O  |

```

=====
# CRYSTAL DATA
#-----
data_VESTA_phase_1

_chemical_name_common      'Mn8 Co4 O16'
_cell_length_a             5.903414
_cell_length_b             5.903414
_cell_length_c             8.348294
_cell_angle_alpha          90.000000
_cell_angle_beta           90.000000
_cell_angle_gamma          90.000000
_cell_volume               290.940558
_space_group_name_H-M_alt  'I 41/a m d'
_space_group_IT_number     141

loop_
_space_group_symop_operation_xyz
'x, y, z'
'-x+1/2, -y+1/2, z+1/2'
'-y, x+1/2, z+1/4'
'y+1/2, -x, z+3/4'
'-x+1/2, y, -z+3/4'
'x, -y+1/2, -z+1/4' 'y+1/2, x+1/2,
-z+1/2' '-y, -x, -z'
'-x, -y+1/2, -z+1/4'
'x+1/2, y, -z+3/4'
'y, -x, -z'
'-y+1/2, x+1/2, -z+1/2' 'x+1/2, -
y+1/2, z+1/2'
'-x, y, z'
'-y+1/2, -x, z+3/4'
'y, x+1/2, z+1/4' 'x+1/2, y+1/2,
z+1/2' '-x, -y, z'
'-y+1/2, x, z+3/4'
'y, -x+1/2, z+1/4'
'-x, y+1/2, -z+1/4'
'x+1/2, -y, -z+3/4'
'y, x, -z'
'-y+1/2, -x+1/2, -z+1/2'
'-x+1/2, -y, -z+3/4'
'x, y+1/2, -z+1/4' 'y+1/2, -x+1/2, -
z+1/2'
'-y, x, -z'
'x, -y, z'
'-x+1/2, y+1/2, z+1/2' '-y, -
x+1/2, z+1/4'
'y+1/2, x, z+3/4'

loop_
_atom_site_label
_atom_site_occupancy
_atom_site_fract_x
_atom_site_fract_y
_atom_site_fract_z

```

\_atom\_site\_adp\_type  
 \_atom\_site\_B\_iso\_or\_equiv  
 \_atom\_site\_type\_symbol

|     |     |          |          |          |      |          |    |
|-----|-----|----------|----------|----------|------|----------|----|
| Mn1 | 1.0 | 0.250000 | 0.500000 | 0.875000 | Biso | 1.000000 | M  |
| Mn2 | 1.0 | 0.750000 | 0.500000 | 0.875000 | Biso | 1.000000 | M  |
| Mn3 | 1.0 | 0.000000 | 0.250000 | 0.625000 | Biso | 1.000000 | M  |
| Mn4 | 1.0 | 0.000000 | 0.750000 | 0.625000 | Biso | 1.000000 | M  |
| Mn5 | 1.0 | 0.750000 | 0.000000 | 0.375000 | Biso | 1.000000 | M  |
| Mn6 | 1.0 | 0.250000 | 0.000000 | 0.375000 | Biso | 1.000000 | M  |
| Mn7 | 1.0 | 0.500000 | 0.750000 | 0.125000 | Biso | 1.000000 | M  |
| Mn8 | 1.0 | 0.500000 | 0.250000 | 0.125000 | Biso | 1.000000 | M  |
| Co1 | 1.0 | 0.500000 | 0.000000 | 0.750000 | Biso | 1.000000 | Co |
| Co2 | 1.0 | 0.000000 | 0.000000 | 0.000000 | Biso | 1.000000 | Co |
| Co3 | 1.0 | 0.000000 | 0.500000 | 0.250000 | Biso | 1.000000 | Co |
| Co4 | 1.0 | 0.500000 | 0.500000 | 0.500000 | Biso | 1.000000 | Co |
| O1  | 1.0 | 0.234984 | 0.500000 | 0.634084 | Biso | 1.000000 | O  |
| O2  | 1.0 | 0.765016 | 0.500000 | 0.634084 | Biso | 1.000000 | O  |
| O3  | 1.0 | 0.234984 | 0.000000 | 0.615916 | Biso | 1.000000 | O  |
| O4  | 1.0 | 0.765016 | 0.000000 | 0.615916 | Biso | 1.000000 | O  |
| O5  | 1.0 | 0.000000 | 0.265016 | 0.865916 | Biso | 1.000000 | O  |
| O6  | 1.0 | 0.000000 | 0.734984 | 0.865916 | Biso | 1.000000 | O  |
| O7  | 1.0 | 0.500000 | 0.265016 | 0.884084 | Biso | 1.000000 | O  |
| O8  | 1.0 | 0.500000 | 0.734984 | 0.884084 | Biso | 1.000000 | O  |
| O9  | 1.0 | 0.734984 | 0.000000 | 0.134084 | Biso | 1.000000 | O  |
| O10 | 1.0 | 0.265016 | 0.000000 | 0.134084 | Biso | 1.000000 | O  |
| O11 | 1.0 | 0.734984 | 0.500000 | 0.115916 | Biso | 1.000000 | O  |
| O12 | 1.0 | 0.265016 | 0.500000 | 0.115916 | Biso | 1.000000 | O  |
| O13 | 1.0 | 0.500000 | 0.765016 | 0.365916 | Biso | 1.000000 | O  |
| O14 | 1.0 | 0.500000 | 0.234984 | 0.365916 | Biso | 1.000000 | O  |
| O15 | 1.0 | 0.000000 | 0.765016 | 0.384084 | Biso | 1.000000 | O  |
| O16 | 1.0 | 0.000000 | 0.234984 | 0.384084 | Biso | 1.000000 | O  |
